# Supplementary material for: Patient Portals to Support Care Partner Engagement in Adolescent and Adult Populations: A Scoping Review
Source: PubMed Central journal article supplement (PMC9857556; doi:10.1001/jamanetworkopen.2022.48696), 2022-12-28
Supplement: jamanetwopen-e2248696-s002.pdf [file jamanetwopen-e2248696-s002.pdf]

## Data Sharing Statement

Gleason. Patient Portals to Support Care Partner Engagement in Adolescent and Adult Populations. *JAMA Netw Open*. Published December 28, 2022.

doi:10.1001/jamanetworkopen.2022.48696

### Data

**Data available:** No

### Additional Information

**Explanation for why data not available:** All data collected are already available in paper, given the nature of a scoping review.
