# Supplementary material for: Patient Portals to Support Care Partner Engagement in Adolescent and Adult Populations: A Scoping Review
Source: JAMA Netw Open. 2022 Dec 28;5(12):e2248696. doi: 10.1001/jamanetworkopen.2022.48696 (PMC9857556; doi:10.1001/jamanetworkopen.2022.48696)
Supplement: Supplement 1. — eTable 1. Search Strategy eTable 2. Data Extraction Table eTable 3. Detailed Characteristics of Studies Included in Scoping Review eTable 4. Consequences of Care Partner Use of the Patient Portal by the Otte-Trojel Framework eReferences [file jamanetwopen-e2248696-s001.pdf]

## Supplementary Online Content

Gleason KT, Peereboom D, Wec A, Wolff JL. Patient portals to support care partner engagement in adolescent and adult populations: a scoping review. *JAMA Netw Open*. 2022;5(12):e2248696. doi:10.1001/jamanetworkopen.2022.48696

**eTable 1.** Search Strategy

**eTable 2.** Data Extraction Table

**eTable 3.** Detailed Characteristics of Studies Included in Scoping Review

**eTable 4.** Consequences of Care Partner Use of the Patient Portal by the Otte-Trojel Framework

**eReferences**

This supplementary material has been provided by the authors to give readers additional information about their work.

**eTable 1.** Search Strategy

We applied the following search strategy to PubMed, Web of Science, Embase, and PsychInfo:

| Search Concept        | Search line number | Search strategy                                              |
|-----------------------|--------------------|--------------------------------------------------------------|
| <b>Care partner</b>   | 1                  | "Caregivers"[MeSH Terms]                                     |
|                       | 2                  | "Caregiver*" ti,ab,kw,kf                                     |
|                       | 3                  | "Care Giver" ti,ab,kw,kf                                     |
|                       | 4                  | "Spouse Caregiver*" ti,ab,kw,kf                              |
|                       | 5                  | "delegate*" ti,ab,kw,kf                                      |
|                       | 6                  | "surrogate*" ti,ab,kw,kf                                     |
|                       | 7                  | "parent child relations"[MeSH Terms]                         |
|                       | 8                  | child relationship, parent[MeSH Terms])                      |
|                       | 9                  | child of impaired parents[MeSH Terms]                        |
|                       | 10                 | "legal guardians"[MeSH Terms]                                |
|                       | 11                 | "legal guardians/legislation and jurisprudence"[MeSH Terms]) |
|                       | 12                 | "mother child relations"[MeSH Terms]                         |
|                       | 13                 | "father child relation"[MeSH Terms])                         |
|                       | 14                 | "caregivers/organization and administration"[MeSH Terms]     |
|                       | 15                 | caregiver, family[MeSH Terms]                                |
|                       | 16                 | Caregiver, spouse[MeSH Terms]                                |
|                       | 17                 | or/1-17                                                      |
| <b>Patient portal</b> | 18                 | "patient portal*" ti,ab,kw,kf                                |
|                       | 19                 | "patient portal" [MeSH Term]                                 |
|                       | 20                 | "Mychart" ti,ab,kw,kf                                        |
|                       | 21                 | Or/18-21                                                     |
| <b>Total</b>          | 22                 | 17 and 21                                                    |

**eTable 2.** Data Extraction Table

| Information to Extract        | Definitions and Details                                                              | Example Extraction                                                                                   |
|-------------------------------|--------------------------------------------------------------------------------------|------------------------------------------------------------------------------------------------------|
| Extractor Initials            | Your initials                                                                        | K.G                                                                                                  |
| Author                        | First author of publication                                                          | Latulipe                                                                                             |
| Year                          | Year of publication                                                                  | 2015                                                                                                 |
| Country                       | Country of publication                                                               | US                                                                                                   |
| Sample Size and Composition   | Size of sample and the unit, e.g. patients, care partners, providers, hospitals etc. | 51 (36 patients + 16 care partners)                                                                  |
| Journal                       | Publishing journal                                                                   | Proc SIGCHI Conf Hum Factor Comput Syst                                                              |
| Volume, Issue, Pages          | Publication's volume, issue and pages in journal                                     | 2859-3868                                                                                            |
| Title                         | Title of publication                                                                 | Design Considerations for Patient Portal Adoption by Low-Income, Older Adults                        |
| Data Collection               | Method(s) of data collection (EMR data, survey, interview/focus groups, multiple)    | Interviews/focus groups                                                                              |
| Approach                      | Qualitative/quantitative/mixed                                                       | Qualitative                                                                                          |
| Patient Age, Population       | Patient age group and other population factors                                       | 65+, low-income patients and caregivers                                                              |
| Setting                       | Study site/location description                                                      | 3 health systems                                                                                     |
| Rationale for Inclusion       | Select research question(s) that apply: RQ1, RQ2, RQ3                                | RQ2, RQ3                                                                                             |
| Provider                      | Name of healthcare delivery organization, if applicable                              | Kaiser Permanente, Northern California                                                               |
| Inclusion Criteria            | The study's inclusion criteria for the sample                                        | Patient with 1+ chronic condition, from clinical registry                                            |
| EMR Vendor                    | EMR vendor, if applicable                                                            | Epic                                                                                                 |
| Patient Uptake                | Patient uptake of the patient portal (n, %), as reported in the study                | 76.30%                                                                                               |
| Proxy Uptake                  | Proxy uptake of the proxy portal (n, %), as reported in the study                    | 17.60%                                                                                               |
| Messages Sent by Patient      | Messages sent by patient via patient portal (n, %), as reported in the study         | 904 of 1000 (90.4%) initiated by patient; 1445 of 2715 messages (53.2%) sent by patient              |
| Messages Sent by Care Partner | Messages sent by care partner via patient portal (n, %), as reported in the study    | 41 of 1000 threads (4.1%) initiated by care partner; 69 of 2715 messages (2.5%) sent by care partner |

| Factors affecting care partner uptake and use of the patient portal by the SEIPS Model(1, 2) |                                                                                                                                                              |                                                                                                                                                                                     |
|----------------------------------------------------------------------------------------------|--------------------------------------------------------------------------------------------------------------------------------------------------------------|-------------------------------------------------------------------------------------------------------------------------------------------------------------------------------------|
| Work System Factors (Person - Patient)                                                       |                                                                                                                                                              |                                                                                                                                                                                     |
| Age                                                                                          | Data indicating patient age as a factor affecting care partner uptake/use of patient portal                                                                  | "There was no difference in mean age between patients who had messages apparently sent by proxies through patient portal accounts versus proxy portal accounts."                    |
| Gender                                                                                       | Data indicating patient gender as a factor affecting care partner uptake/use of patient portal                                                               | "Patients who had proxies send messages through patient accounts were more likely to be married and male compared with patients whose proxies used proxy accounts to send message." |
| Need for assistance                                                                          | Data indicating patient's need for assistance (english proficiency, comfort with technology) as a factor affecting care partner uptake/use of patient portal | "Patients with a higher % of proxy-sent messages had higher rates of limited English proficiency (16.1% vs 3.2% vs 3.5%, $p < 0.05$ )"                                              |
| Illness severity                                                                             | Data indicating patient illness severity as a factor affecting care partner uptake/use of patient portal                                                     | "Caring for a patient with a chronic condition was associated with greater odds of portal use for caregiving (OR: 1.66, $P = 0.022$ )."                                             |
| Mental Health condition                                                                      | Data indicating patient's mental health condition as a factor affecting care partner uptake/use of patient portal                                            | "Caring for a patient with a mental health condition was associated with greater odds of portal use for caregiving (OR: 1.71, $P = 0.013$ )."                                       |
| Race                                                                                         | Data indicating patient race as a factor affecting care partner uptake/use of patient portal                                                                 | "patients predicted as having high percent PPSMs [predicted proxy secure messaging] were ... more likely to be ... non-white (80.7% vs 66.8% vs 72.4%, $p < 0.05$ )"                |
| Work System Factors (Person - Care Partner)                                                  |                                                                                                                                                              |                                                                                                                                                                                     |
| Gender                                                                                       | Data indicating care partner's gender as a factor affecting portal uptake/use                                                                                | "Being female (OR 2.58, 95% CI 1.40-4.75; $P = .002$ ) was associated with a significantly higher likelihood of using their care recipient's portal"                                |
| Race                                                                                         | Data indicating care partner's race as a factor affecting portal uptake/use                                                                                  | "care recipient portals were more likely to be accessed by White caregivers"                                                                                                        |
| Relationship to patient                                                                      | Data indicating care partner's relationship to patient as a factor affecting care partner uptake/use of the patient portal                                   | "caregivers supporting a parent were significantly less likely than those supporting a spouse/partner to report using the online medical record (OR = 0.28, $p = 0.01$ )."          |

|                                                                                     |                                                                                                                                                                                |                                                                                                                                                                                                                 |
|-------------------------------------------------------------------------------------|--------------------------------------------------------------------------------------------------------------------------------------------------------------------------------|-----------------------------------------------------------------------------------------------------------------------------------------------------------------------------------------------------------------|
| Health literacy level/ education                                                    | Data indicating care partner's health literacy level/ education level as a factor affecting care partner uptake/use of the patient portal                                      | "for most tasks, a higher percentage of patients than caregivers required assistance from staff in order to complete the task... Explaining medical terms was the most commonly cited wish."                    |
| Technology experience                                                               | Data indicating care partner's technology experience as a factor affecting care partner uptake/use of the patient portal                                                       | "Care partners were more likely than patients to report using the Internet daily (87.6% versus 55.0%, $P < .001$ ) and using a computer to perform health management activities (95.5% and 48.4%, $P < .001$ )" |
| Household income                                                                    | Data indicating care partner's household income as a factor affecting care partner uptake/use of the patient portal                                                            | "Care partners who logged into MyChart were more likely to... have worked in the last week (70.0% vs 42.4%; $p = 0.03$ ) than care partners who did not."                                                       |
| Illness/ Illness severity                                                           | Data indicating care partner's illness/ illness severity as a factor affecting care partner uptake/use of the patient portal                                                   | "Having a chronic health condition was associated with greater odds of portal use for self-care (OR: 1.33, $P < 0.001$ ) but not for caregiving."                                                               |
| Mental Health condition                                                             | Data indicating care partner's mental health condition as a factor affecting care partner uptake/use of the patient portal                                                     | "Having a mental health condition was associated with greater odds of portal use for self-care (OR: 1.23, $P = 0.01$ ) but reduced odds of portal use for caregiving (OR: 0.61, $P = 0.03$ )."                  |
| <b>Work System Factors - Environment (Physical, Socio-organizational, External)</b> |                                                                                                                                                                                |                                                                                                                                                                                                                 |
| Clinical-site factors                                                               | Data indicating factors at the clinical site (organizational, technical or policy, or lack of clinician/staff awareness of proxy access) limiting availability of proxy access | "7% of personnel did not know about proxy accounts, 45% endorsed password-sharing for caregivers to the primary portal account"                                                                                 |
| Location/setting                                                                    | Data indicating location or setting (of healthcare delivery or of patient/care partner use of the portal) as a factor affecting care partner use/uptake of the patient portal  | 68% of hospitals offered proxy accounts to caregivers                                                                                                                                                           |
| Internet access                                                                     | Data indicating care partner's internet access as a factor affecting care partner use/uptake of the patient portal                                                             | internet access is less available in rural settings, variable in low-income urban areas                                                                                                                         |

| <b>Work System Factors (Tasks)</b>                                                            |                                                                                                                                                                                                                                    |                                                                                                                                                                                                               |
|-----------------------------------------------------------------------------------------------|------------------------------------------------------------------------------------------------------------------------------------------------------------------------------------------------------------------------------------|---------------------------------------------------------------------------------------------------------------------------------------------------------------------------------------------------------------|
| Access to information                                                                         | Data indicating information types accessed by care partners (lab results, visit notes, patient health status details) as a factor affecting care partner uptake/use of the patient portal                                          | "Care partners read visit notes more frequently than patients. 98% of care partners indicated that 'making visit notes available on the electronic portal was a good idea.' "                                 |
| Coordination of care                                                                          | Data indicating patient portal functionality accessed by care partners (messaging, appointment scheduling, filling prescriptions) as a factor affecting care partner uptake/use of the patient portal                              | "Patients indicated that they shared access to their patient portal account to facilitate involvement of care partners in managing healthcare activities (41.9%)"                                             |
| <b>Processes factors (care processes): how work is done and how it flows</b>                  |                                                                                                                                                                                                                                    |                                                                                                                                                                                                               |
| Privacy and security                                                                          | Data indicating that privacy and security as a factor affecting care partner uptake/use of the patient portal                                                                                                                      | 68.1 % of respondents indicated no concerns about privacy and confidentiality                                                                                                                                 |
| Review of proxy access status                                                                 | Data indicating the patient's ability to control proxy access as a factor affecting care partner uptake/use of the patient portal                                                                                                  | Patients desired graduated access rights so patients could determine more limited access in some cases; caregivers were in favor of broader access                                                            |
| Convenience of access type                                                                    | Data indicating ease in establishing proxy access as factor affecting care partner uptake/use of the patient portal                                                                                                                | Care partners preferred accessing the patient portal through the patient's account because it was more convenient than proxy                                                                                  |
| <b>Consequences of Care Partner Use of the Patient Portal by the Otte-Trojel Framework(3)</b> |                                                                                                                                                                                                                                    |                                                                                                                                                                                                               |
| Insight into Patient Health and Personhood                                                    | Data indicating that care partner access to patient information through the patient portal enables or facilitates patients and care partners to be involved in its application and in ensuring its accuracy and comprehensiveness. | "One of the main reasons participants felt caregiver access was beneficial was in the caregiver's ability to help them understand the information on the portal, such as doctor's messages and test results." |
| Activation of Information                                                                     | Data indicating that care partner use of the patient portal increases the effectiveness and targetability of information                                                                                                           | "Among those using the portal as a care partner, 94.2% reported that it was more convenient than other ways of participating in another person's health care."                                                |
| Continuity of Care                                                                            | Data indicating that care partner use of the patient portal was relevant to continuity of care                                                                                                                                     | Care partners who accessed the portal reported a higher ability to remember the patient's care plan (94.3% and 93.5%), felt more in control of care (88.6% and 89.7%).                                        |

|             |                                                                                                      |                                                                                                                  |
|-------------|------------------------------------------------------------------------------------------------------|------------------------------------------------------------------------------------------------------------------|
| Convenience | Data indicating that care partner use of the patient portal facilitates addressing health care needs | "Several patients discussed the benefits of caregivers being able to access the portal in case of an emergency." |
|-------------|------------------------------------------------------------------------------------------------------|------------------------------------------------------------------------------------------------------------------|

| <b>eTable 3.</b> Detailed characteristics of studies included in scoping review |                            |                                                                                                                                                         |                                                |                             |                               |                         |                 |
|---------------------------------------------------------------------------------|----------------------------|---------------------------------------------------------------------------------------------------------------------------------------------------------|------------------------------------------------|-----------------------------|-------------------------------|-------------------------|-----------------|
| <b>First Author, Year</b>                                                       | <b>Journal</b>             | <b>Title</b>                                                                                                                                            | <b>Sample</b>                                  | <b>Patient age category</b> | <b>Sample characteristics</b> | <b>Data collection</b>  | <b>Approach</b> |
| Barron, 2014                                                                    | Stud Health Technol Inform | Exploring three perspectives on feasibility of a patient portal for older adult                                                                         | 7 patients, 16 care partners                   | Older adults                | Illness-specific              | Focus groups/interviews | Qualitative     |
| Bergman, 2008                                                                   | Perspect Health Inf Manag  | Teen use of a patient portal: a qualitative study of parent and teen attitudes                                                                          | 35 patients, 34 care partners <sup>a</sup>     | Adolescents                 | General                       | Focus groups/interviews | Qualitative     |
| Chimowitz, 2018                                                                 | Jt Comm J Qual Patient Saf | Empowering informal caregivers with health information: OpenNotes as a safety strategy                                                                  | 6,908 patients, 150 care partners <sup>b</sup> | Adults                      | General                       | Multiple                | Quantitative    |
| Crotty, 2015                                                                    | JAMA Intern Med            | Information sharing preferences of older patients and their families                                                                                    | 30 patients, 23 care partners                  | Older adults                | General                       | Focus groups/interviews | Qualitative     |
| Davis, 2012                                                                     | Electron. J. Health Inform | Improving informal caregiver engagement with a patient web portal                                                                                       | 343 care partners                              | Adults                      | General                       | Survey                  | Mixed           |
| Dickman Portz, 2021                                                             | J Palliat Med              | Characteristics of patients and proxy caregivers using patient portals in the setting of serious illness and end of life                                | 12,646 patients, 311 care partners             | Adults                      | Illness-specific              | EMR/patient portal data | Quantitative    |
| Fitzsimons, 2021                                                                | Epilepsy Behav             | Democratizing epilepsy care: utility and usability of an electronic patient portal                                                                      | 72 patients, 18 care partners                  | Adults                      | Illness-specific              | Survey                  | Quantitative    |
| Gupta, 2021                                                                     | JMIR Cancer                | Electronic health record portal use by family caregivers of patients undergoing hematopoietic cell transplantation: United States national survey study | 948 care partners                              | Adults                      | Illness-specific              | Survey                  | Quantitative    |
| Hodgson, 2022                                                                   | J Patient Exp              | Utilization of EHR to improve support person engagement in health care for patients with chronic conditions                                             | 12 patients, 7 care partners, 2 providers      | Adults                      | Illness-specific              | Focus groups/interviews | Qualitative     |
| Iott, 2020                                                                      | J Gen Intern Med           | Family caregiver access of online medical records: findings from the Health Information National Trends Survey                                          | 191 care partners                              | Adults                      | General                       | Survey                  | Quantitative    |
| Ip, 2021                                                                        | JAMA Netw Open             | Assessment of prevalence of adolescent patient portal account access by guardians                                                                       | 3,429 patient portal accounts                  | Adolescents                 | General                       | EMR/patient portal data | Quantitative    |

|                            |                                         |                                                                                                                                                                 |                                            |               |                  |                         |              |
|----------------------------|-----------------------------------------|-----------------------------------------------------------------------------------------------------------------------------------------------------------------|--------------------------------------------|---------------|------------------|-------------------------|--------------|
| Jackson, 2021              | Patient Educ Couns                      | Care partners reading patients' visit notes via patient portals: characteristics and perceptions                                                                | 28,782 patients, 874 care partners         | Adults        | General          | Multiple                | Mixed        |
| Latulipe, 2015             | Proc SIGCHI Conf Hum Factor Comput Syst | Design considerations for patient portal adoption by low-income, older adults                                                                                   | 36 patients, 16 care partners              | Older adults  | General          | Focus groups/interviews | Qualitative  |
| Latulipe, 2018             | J Med Internet Res                      | Insights into older adult patient concerns around the caregiver proxy portal use: qualitative interview study                                                   | 10 patients                                | Older adults  | Illness-specific | Focus groups/interviews | Qualitative  |
| Latulipe, 2020             | JAMA Intern Med                         | Security and privacy risks associated with adult patient portal accounts in US hospitals                                                                        | 102 hospitals                              | NA or unknown | General          | Survey                  | Quantitative |
| Mayberry, 2011             | Diabetes Technol Ther                   | Bridging the digital divide in diabetes: family support and implications for health literacy                                                                    | 61 patients                                | Adults        | Illness-specific | Multiple                | Mixed        |
| Nippak, 2015               | J Hosp Admin                            | Family attitudes towards an electronic personal health record in a long term care facility                                                                      | 65 care partners                           | NA or unknown | Illness-specific | Survey                  | Mixed        |
| Osborn <sup>c</sup> , 2011 | J Am Med Inform Assoc                   | MyHealthAtVanderbilt: policies and procedures governing patient portal functionality                                                                            | >129,800 registered users                  | All ages      | General          | EMR/patient portal data | Mixed        |
| Parsons, 2020              | J Am Med Inform Assoc                   | Preserving privacy for pediatric patient and families: use of confidential note types in pediatric ambulatory care                                              | 402, 964 clinic notes                      | Adolescents   | General          | EMR/patient portal data | Quantitative |
| Pecina, 2020               | Telemed J E Health                      | Frequency of and factors associated with care partner proxy interaction with health care teams using patient portal accounts                                    | 3,000 messages                             | Adults        | General          | EMR/patient portal data | Quantitative |
| Raj, 2021                  | JMIR Aging                              | Evaluation of family caregivers' use of their adult care recipient's patient portal from the 2019 Health Information National Trends Survey: secondary analysis | 320 care partners                          | Adults        | General          | Survey                  | Quantitative |
| Ramirez-Zohfeld, 2020      | J Am Geriatr Soc                        | Use of electronic health records by older adults, 85 years and older, and their caregivers                                                                      | 62 patients, 82 care partners <sup>d</sup> | Older adults  | General          | EMR/patient portal data | Mixed        |
| Reed, 2018                 | JAMA Intern Med                         | Communicating through a patient portal to engage family care partners                                                                                           | 1,824 patients/care partners <sup>e</sup>  | Adults        | Illness-specific | Survey                  | Mixed        |

|                 |                          |                                                                                                                                                                 |                                                        |             |                  |                          |              |
|-----------------|--------------------------|-----------------------------------------------------------------------------------------------------------------------------------------------------------------|--------------------------------------------------------|-------------|------------------|--------------------------|--------------|
| Schnock, 2019   | J Med Internet Res       | Acute care patient portal intervention: portal use and patient activation.                                                                                      | 2,974 patients                                         | Adults      | Illness-specific | Multiple                 | Quantitative |
| Semere, 2019    | J Gen Intern Med         | Secure messaging with physicians by proxies for patients with diabetes: findings from the ECLIPPSE study                                                        | 9,856 patients                                         | Adults      | Illness-specific | EMR/patient portal data  | Quantitative |
| Sharko, 2018    | J Am Med Inform Assoc    | Variability in adolescent portal privacy features: how the unique privacy needs of the adolescent patient create a complex decision-making process              | 25 health systems                                      | Adolescents | General          | Focus groups/inter views | Qualitative  |
| Shimada, 2017   | J Am Med Inform Assoc    | An analysis of patient-provider secure messaging at two Veterans Health Administration medical centers: message content and resolution through secure messaging | 1,000 message threads, 2,715 messages                  | Adults      | General          | EMR/patient portal data  | Quantitative |
| Steitz, 2017    | Appl Clin Inform         | Long-term patterns of patient portal use for pediatric patients at an academic medical center                                                                   | 17,128 patients                                        | Adolescents | General          | EMR/patient portal data  | Quantitative |
| Steitz, 2019    | JAMIA Open               | Policies and procedures governing patient portal use at an Academic Medical Center                                                                              | 375,517 registered accounts for 402,744 patients       | All ages    | General          | EMR/patient portal data  | Quantitative |
| Strudwick, 2020 | Inform Health Soc Care   | Identifying indicators of meaningful patient portal use by psychiatric populations.                                                                             | 12 patients, 6 care partners, 5 providers <sup>f</sup> | All ages    | Illness-specific | Focus groups/inter views | Qualitative  |
| Szilagyi, 2020  | J Am Med Inform Assoc    | Pediatric patient portal use in one health system                                                                                                               | 39,871 patients                                        | Adolescents | General          | EMR/patient portal data  | Quantitative |
| Tieu, 2015      | J Med Internet Res       | Barriers and facilitators to online portal use among patients and caregivers in a safety net health care system: a qualitative study                            | 11 patients, 5 care partners                           | Adults      | Illness-specific | Focus groups/inter views | Qualitative  |
| Turner, 2021    | JAMA Netw Open           | Use of electronic health record patient portal accounts among patients with smartphone-only internet access                                                     | 4,200 patients, 612 care partners                      | Adults      | General          | Survey                   | Quantitative |
| Weis, 2020      | BMC Med Inform Decis Mak | Caregivers' role in using a personal electronic health record: a qualitative study of cancer patients and caregivers in Germany                                 | 22 patients, 9 care partners                           | Adults      | Illness-specific | Focus groups/inter views | Qualitative  |

|             |                         |                                                                                                                       |                                 |               |                  |                          |              |
|-------------|-------------------------|-----------------------------------------------------------------------------------------------------------------------|---------------------------------|---------------|------------------|--------------------------|--------------|
| Wolff, 2016 | J Am Med Inform Assoc   | Patients, care partners, and shared access to the patient portal: online practices at an integrated health system     | 323 patients, 389 care partners | Adults        | General          | EMR/ patient portal data | Quantitative |
| Wolff, 2018 | J Am Med Inform Assoc   | An environmental scan of shared access to patient portals                                                             | 20 health systems               | NA or unknown | General          | Survey                   | Quantitative |
| Wolff, 2021 | NPJ Breast Cancer       | A randomized intervention involving family to improve communication in breast cancer care                             | 118 patient/care partner dyads  | Adults        | Illness-specific | Multiple                 | Quantitative |
| Wolff, 2017 | J Am Med Inform Assoc   | Inviting patients and care partners to read doctors' notes: OpenNotes and shared access to electronic medical records | 184 patients, 252 care partners | Adults        | General          | Multiple                 | Quantitative |
| Wolff, 2019 | Breast Cancer Res Treat | Sharing in care: engaging care partners in the care and communication of breast cancer patients.                      | 132 patient/care partner dyads  | Adults        | Illness-specific | Multiple                 | Quantitative |
| Xie, 2021   | J Adolesc Health        | Ensuring adolescent patient portal confidentiality in the age of the Cures Act Final Rule                             | 3,701 patient portal accounts   | Adolescents   | General          | EMR/ patient portal data | Quantitative |
| Zupa, 2021  | J Gen Intern Med        | Impact of a dyadic intervention on family supporter involvement in helping adults manage Type 2 Diabetes              | 239 patient/care partner dyads  | Adults        | Illness-specific | Survey                   | Quantitative |

Footnotes:

<sup>a</sup>The study team calculated number of patients and care partners from available data.

<sup>b</sup>This sample included 19 parents and 17 teens who participated in focus groups and 15 parents and 18 teens who provided feedback via online bulletin boards.

<sup>c</sup>The breakdown of patients vs. care partner users was not provided.

<sup>d</sup>This study reviewed 1254 portal messages from patients and care partners.

<sup>e</sup>About 76 percent of the sample used the patient portal for their own care needs and of this group, 27.5 percent also used the portal as a care partner.

<sup>f</sup>The providers in this study were peer support workers. The patients were referred to as consumers of psychiatric services.

**eTable 4.** Consequences of Care Partner Use of the Patient Portal by the Otte-Trojel framework

|                                            | Number of Studies |              |               | Exemplar quote                                                                                                                                                                                                                                                                                                                                                                            |
|--------------------------------------------|-------------------|--------------|---------------|-------------------------------------------------------------------------------------------------------------------------------------------------------------------------------------------------------------------------------------------------------------------------------------------------------------------------------------------------------------------------------------------|
|                                            | Qualitative       | Quantitative | Total studies |                                                                                                                                                                                                                                                                                                                                                                                           |
| Insight into Patient Health and Personhood | 6                 | 3            | 9             | "Caregivers also noted the importance of their role as interpreters of health information: <i>'I think he would be looking at [the portal] with me but he just doesn't understand so I would just have to relay the message.'</i> - Female caregiver for parent." Tieu, 2015(4)                                                                                                           |
| Activation of Information                  | 5                 | 2            | 7             | (Care partner) <i>"We can be better at keeping all our other doctors on the same page as our lead doctor. We form better questions for our next office visits, and we keep the doctor informed with earlier feedback when medications or health conditions change."</i> Jackson, 2021(5)                                                                                                  |
| Continuity of Care                         | 5                 | 3            | 8             | <i>"Regardless of the level of support provided, proxies reported EHR access allowed them to provide better support. "</i><br><i>"They (patients and proxies) highlighted how proxy access assisted with: (a) communicating with the healthcare team, (b) reviewing lab results, (c) scheduling appointments, and (d) filling and picking up medication refills."</i> Hodgson, 2022(6)    |
| Convenience                                | 4                 | 2            | 6             | <i>"Another participant explained how the delegate function would help him when he is traveling and needs care ...If I ever end up in an Urgent Care or in an emergency, I now have access to something very quickly that my wife can pull up and [a provider] who doesn't know me can say 'here's what's going on, here are all the medications and the history.'"</i> Mayberry, 2011(7) |

## eReferences

1. Carayon P, Wooldridge A, Hoonakker P, Hundt AS, Kelly MM. SEIPS 3.0: Human-centered design of the patient journey for patient safety. *Appl Ergon*. 2020;84:103033.
2. Holden RJ, Carayon P. SEIPS 101 and seven simple SEIPS tools. *BMJ Qual Saf*. 2021;30(11):901-10.
3. Otte-Trojel T, Rundall TG, de Bont A, van de Klundert J, Reed ME. The organizational dynamics enabling patient portal impacts upon organizational performance and patient health: a qualitative study of Kaiser Permanente. *BMC Health Serv Res*. 2015;15:559.
4. Tieu L, Sarkar U, Schillinger D, Ralston JD, Ratanawongsa N, Pasick R, et al. Barriers and Facilitators to Online Portal Use Among Patients and Caregivers in a Safety Net Health Care System: A Qualitative Study. *J Med Internet Res*. 2015;17(12):e275.
5. Jackson SL, Shucard H, Liao JM, Bell SK, Fossa A, Payne TH, et al. Care partners reading patients' visit notes via patient portals: Characteristics and perceptions. *Patient Educ Couns*. 2022;105(2):290-6.
6. Hodgson J, Welch M, Tucker E, Forbes T, Pye J. Utilization of EHR to Improve Support Person Engagement in Health Care for Patients With Chronic Conditions. *J Patient Exp*. 2022;9:23743735221077528.
7. Mayberry LS, Kripalani S, Rothman RL, Osborn CY. Bridging the digital divide in diabetes: family support and implications for health literacy. *Diabetes Technol Ther*. 2011;13(10):1005-12.
